# Supplementary material
Source: PubMed Central journal article supplement (PMC6895456)
Supplement: ajcr0009-2456-f6.pdf [file ajcr0009-2456-f6.pdf]

## DC vaccine elicits tumor regression in PDAC

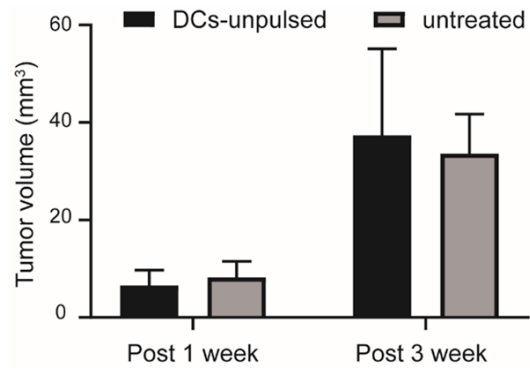

**Figure S1.** Measurement of tumor volumes in orthotopic PDAC mice (n = 4). P = 0.916. Data are expressed as the mean  $\pm$  SEM. Statistical analysis was performed by using one-way ANOVA.
